# Supplementary material
Source: Springer Nature journal article supplement (https://www.springerprofessional.de/resource/supplementary/13638_2014_1009_MOESM3_ESM.pdf/11899006)

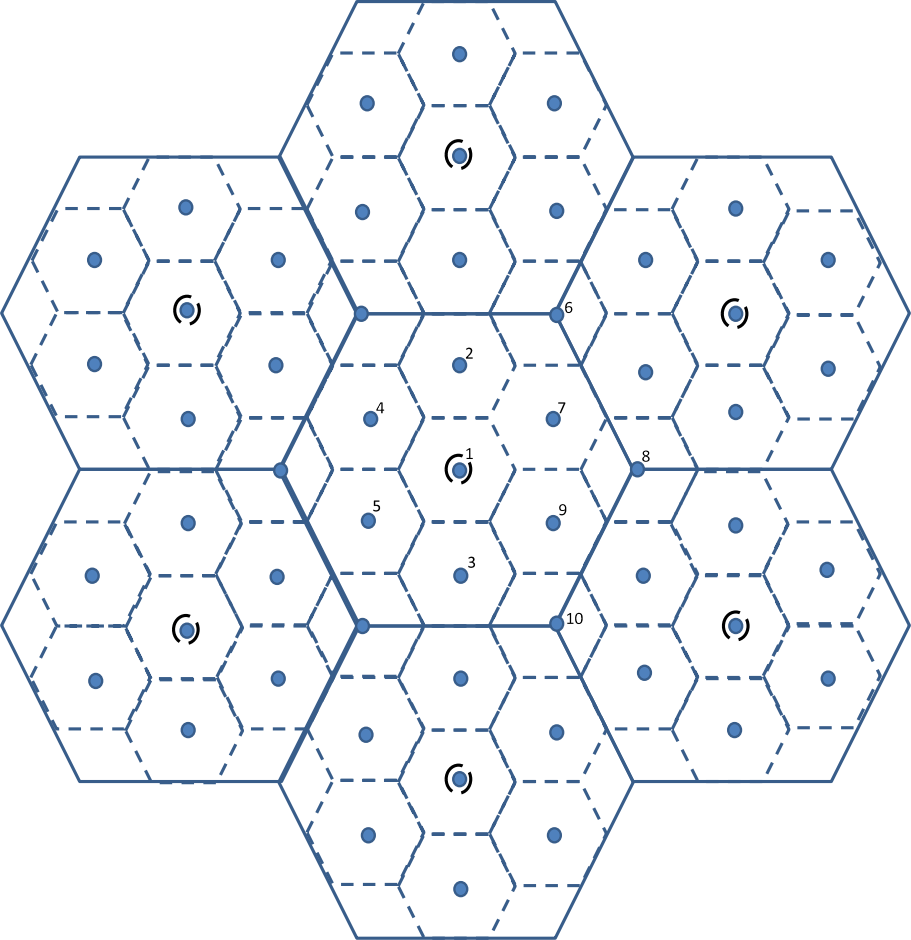

●  $q\Lambda_1$

⊙  $\Lambda$

Supplement: MOESM3 [file 11899006]
